# Supplementary material
Source: ML conference proceedings conference paper supplement (https://openreview.net/forum?id=aXnUn8vush)

$N=1642, K=10, d=25$

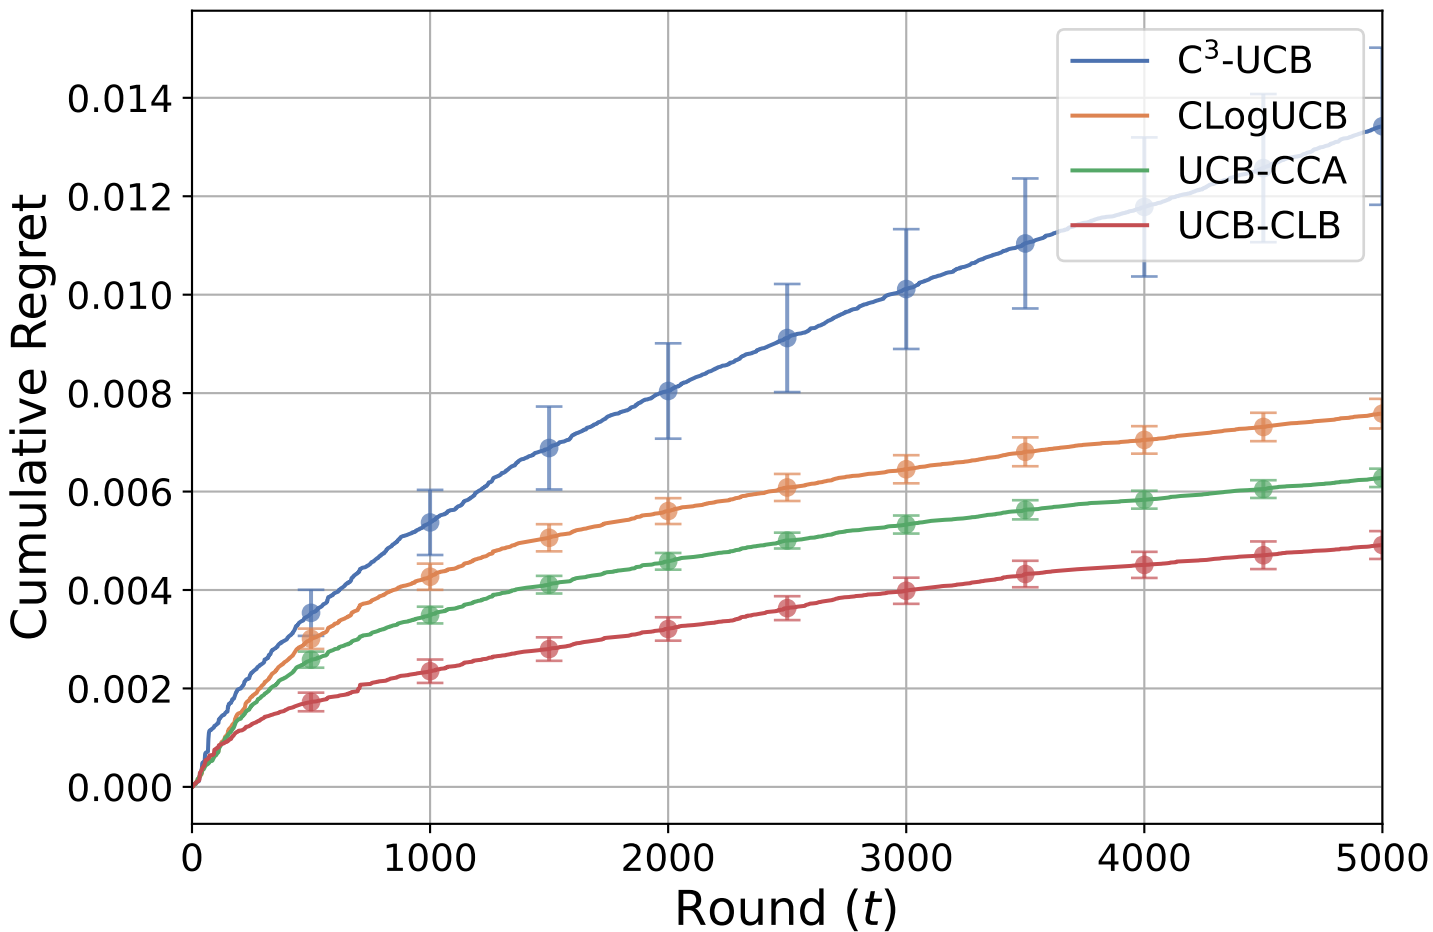

Supplement: supplementary_material [file Compare_Logistic_T=5000_N=1642_K=10_d=25_B=20.0.pdf › [final camera-ready]2025-neurips/code/modules2/results-movielens/regret_images/Compare_Logistic_T=5000_N=1642_K=10_d=25_B=20.0.pdf]

$N=1642$ ,  $K=5$ ,  $d=25$

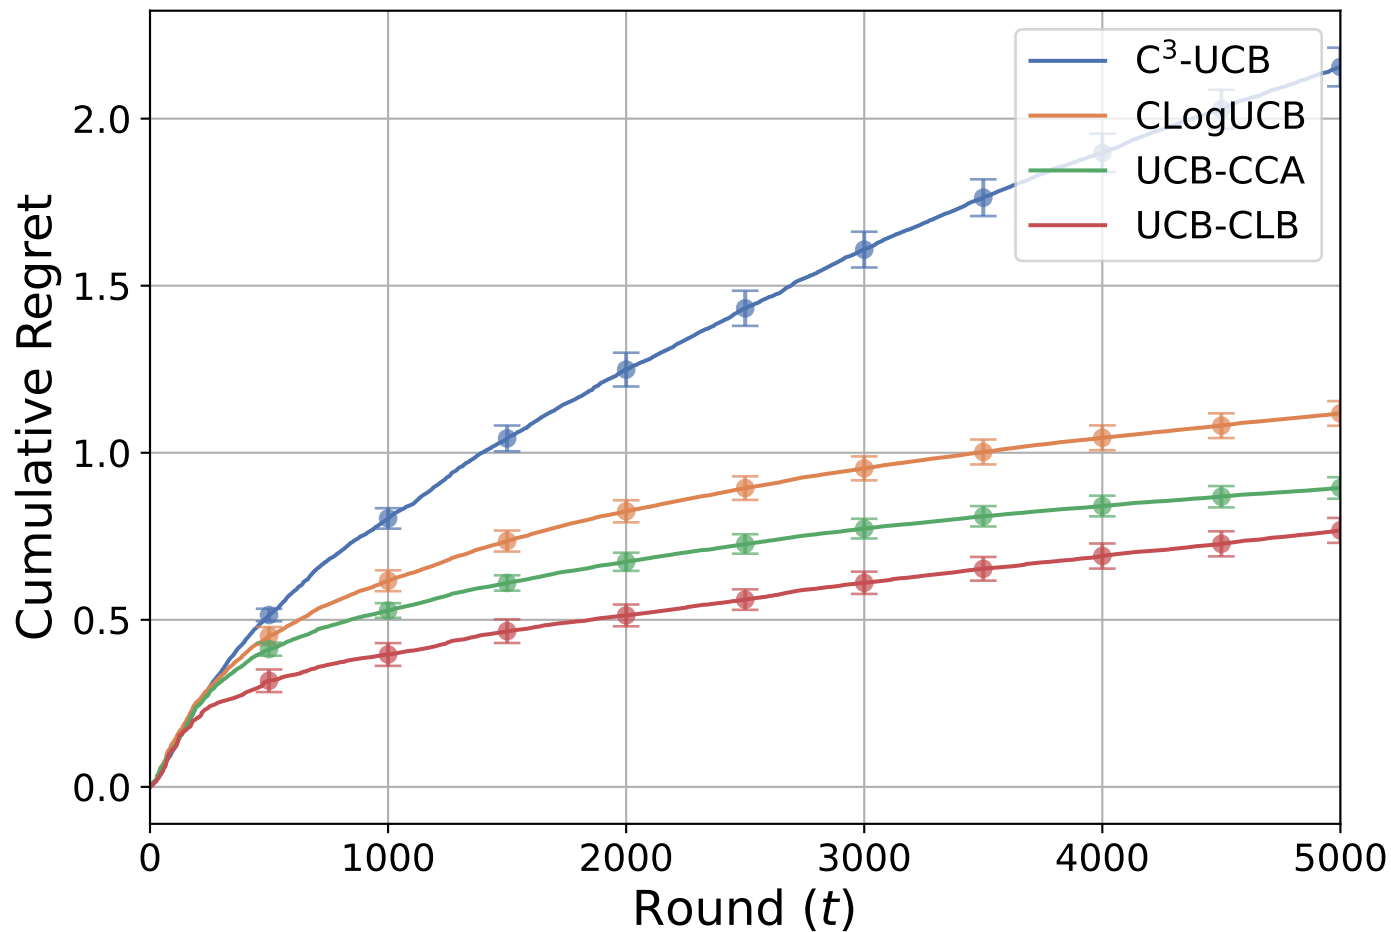

Supplement: supplementary_material [file Compare_Logistic_T=5000_N=1642_K=5_d=25_B=20.0.pdf › [final camera-ready]2025-neurips/code/modules2/results-movielens/regret_images/Compare_Logistic_T=5000_N=1642_K=5_d=25_B=20.0.pdf]

$C^3$ -UCB,  $N=1642$ ,  $d=25$

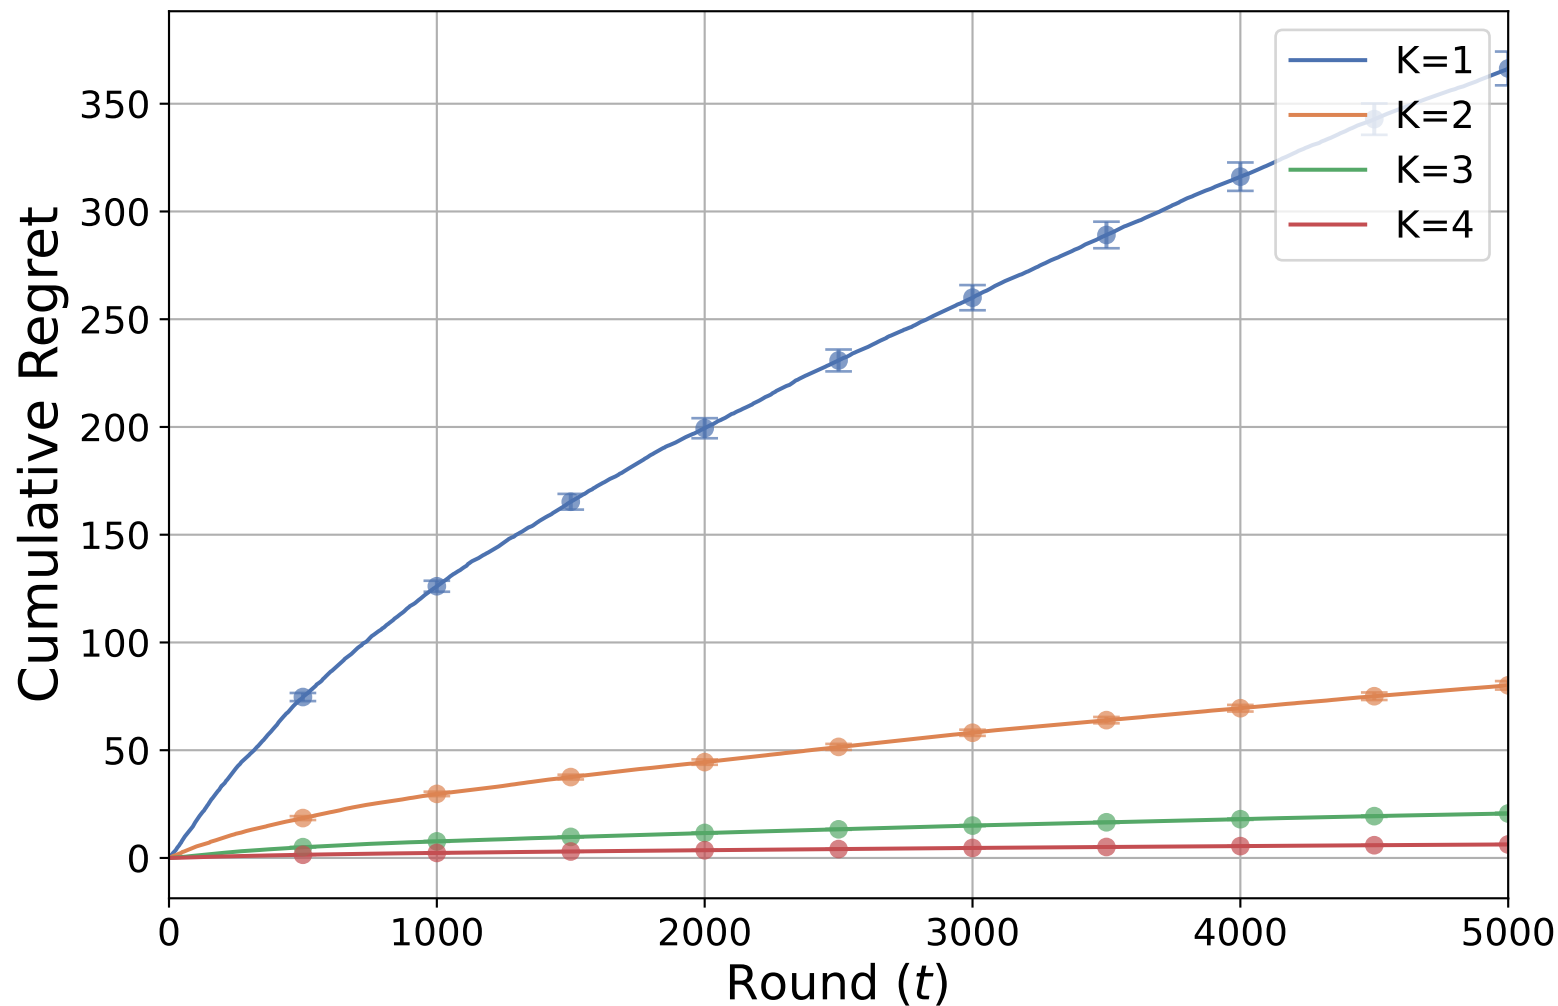

Supplement: supplementary_material [file K_variants_alg=C3UCB_T=5000_N=1642_d=25_B=20.0.pdf › [final camera-ready]2025-neurips/code/modules2/results-movielens/regret_images/K_variants_alg=C3UCB_T=5000_N=1642_d=25_B=20.0.pdf]

UCB-CCA,  $N=1642$ ,  $d=25$

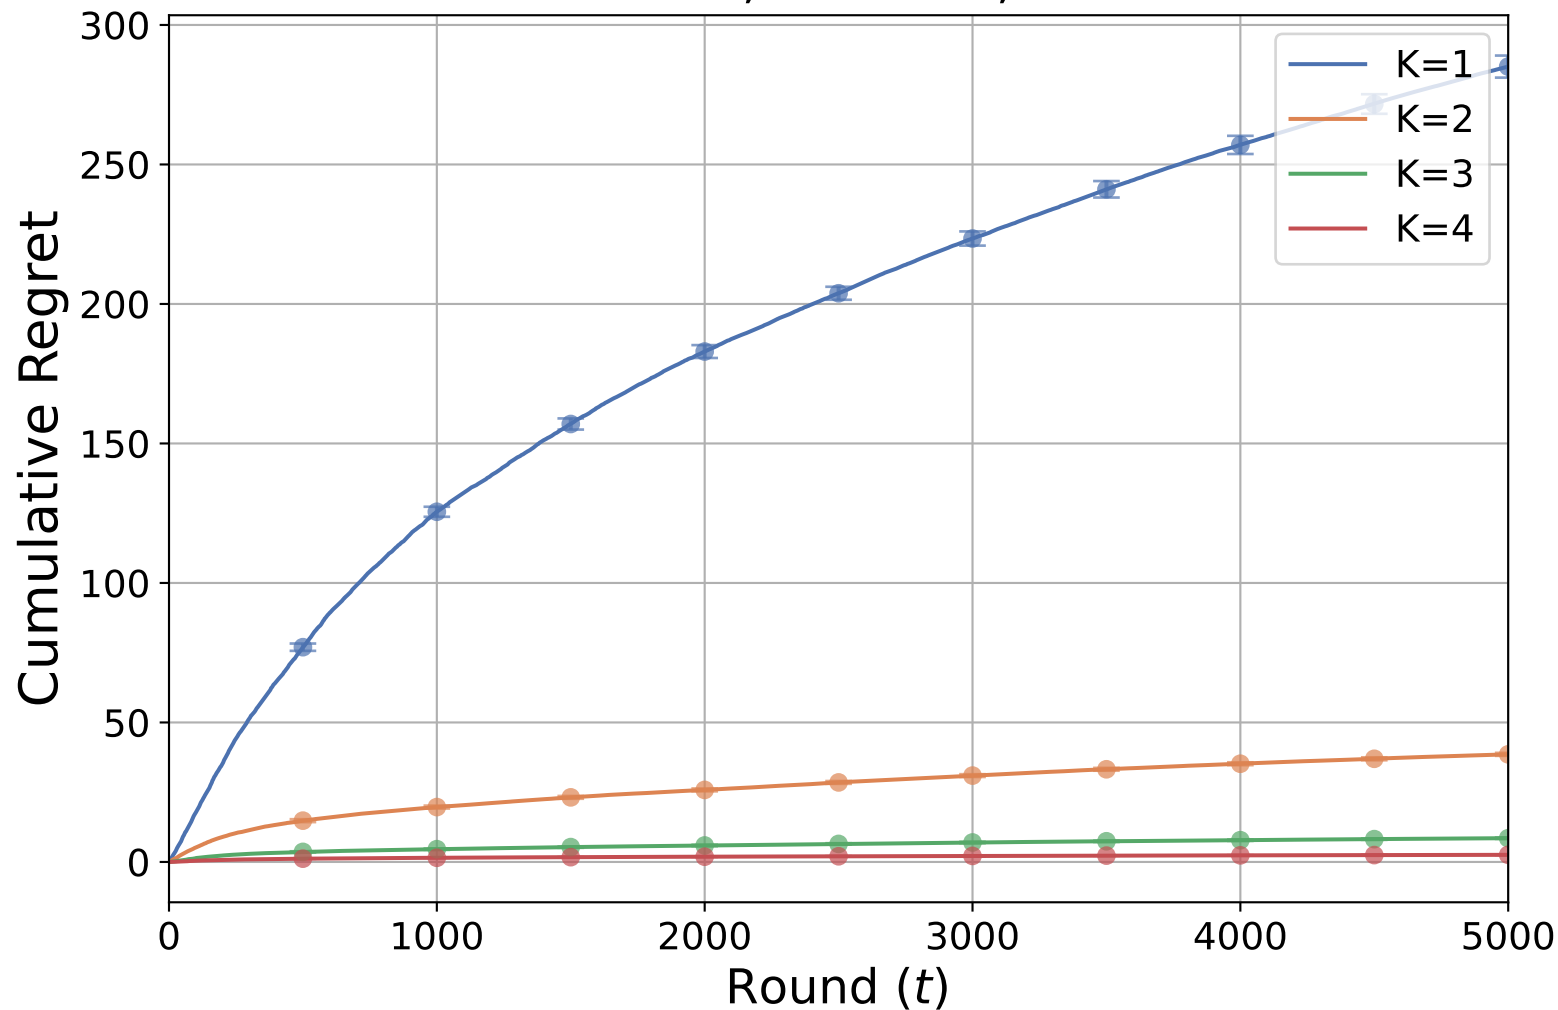

Supplement: supplementary_material [file K_variants_alg=UCBCCA_T=5000_N=1642_d=25_B=20.0.pdf › [final camera-ready]2025-neurips/code/modules2/results-movielens/regret_images/K_variants_alg=UCBCCA_T=5000_N=1642_d=25_B=20.0.pdf]

UCB-CLB,  $N=1642$ ,  $d=25$

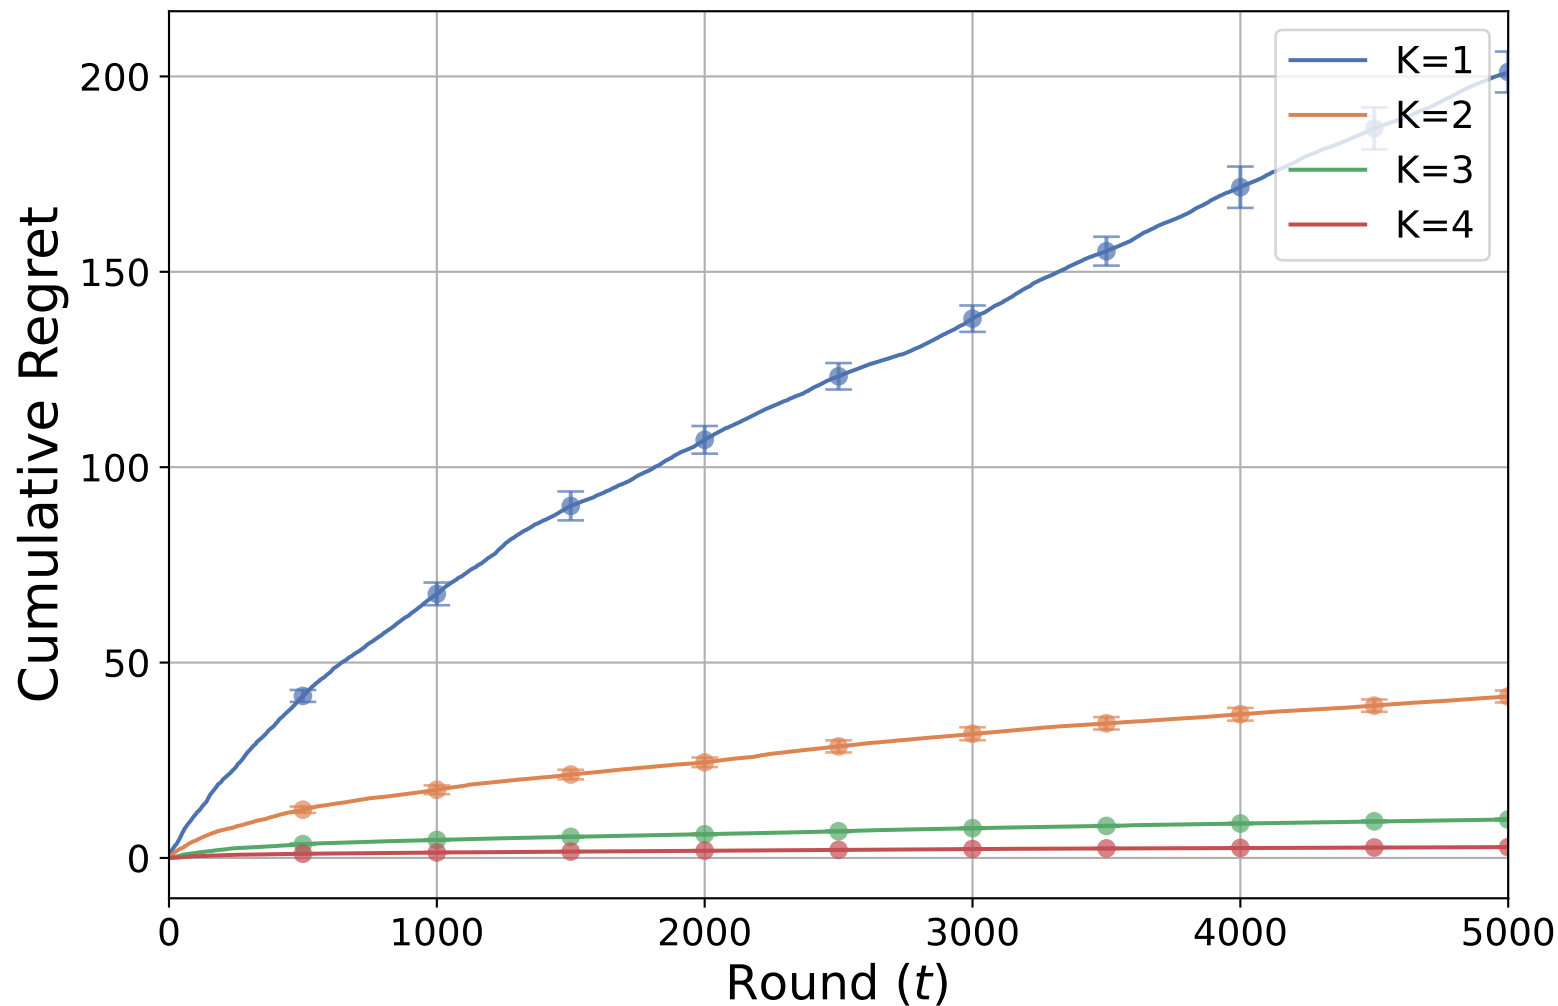

Supplement: supplementary_material [file K_variants_alg=UCBCLB_T=5000_N=1642_d=25_B=20.0.pdf › [final camera-ready]2025-neurips/code/modules2/results-movielens/regret_images/K_variants_alg=UCBCLB_T=5000_N=1642_d=25_B=20.0.pdf]

$N=1642, K=10, d=25$

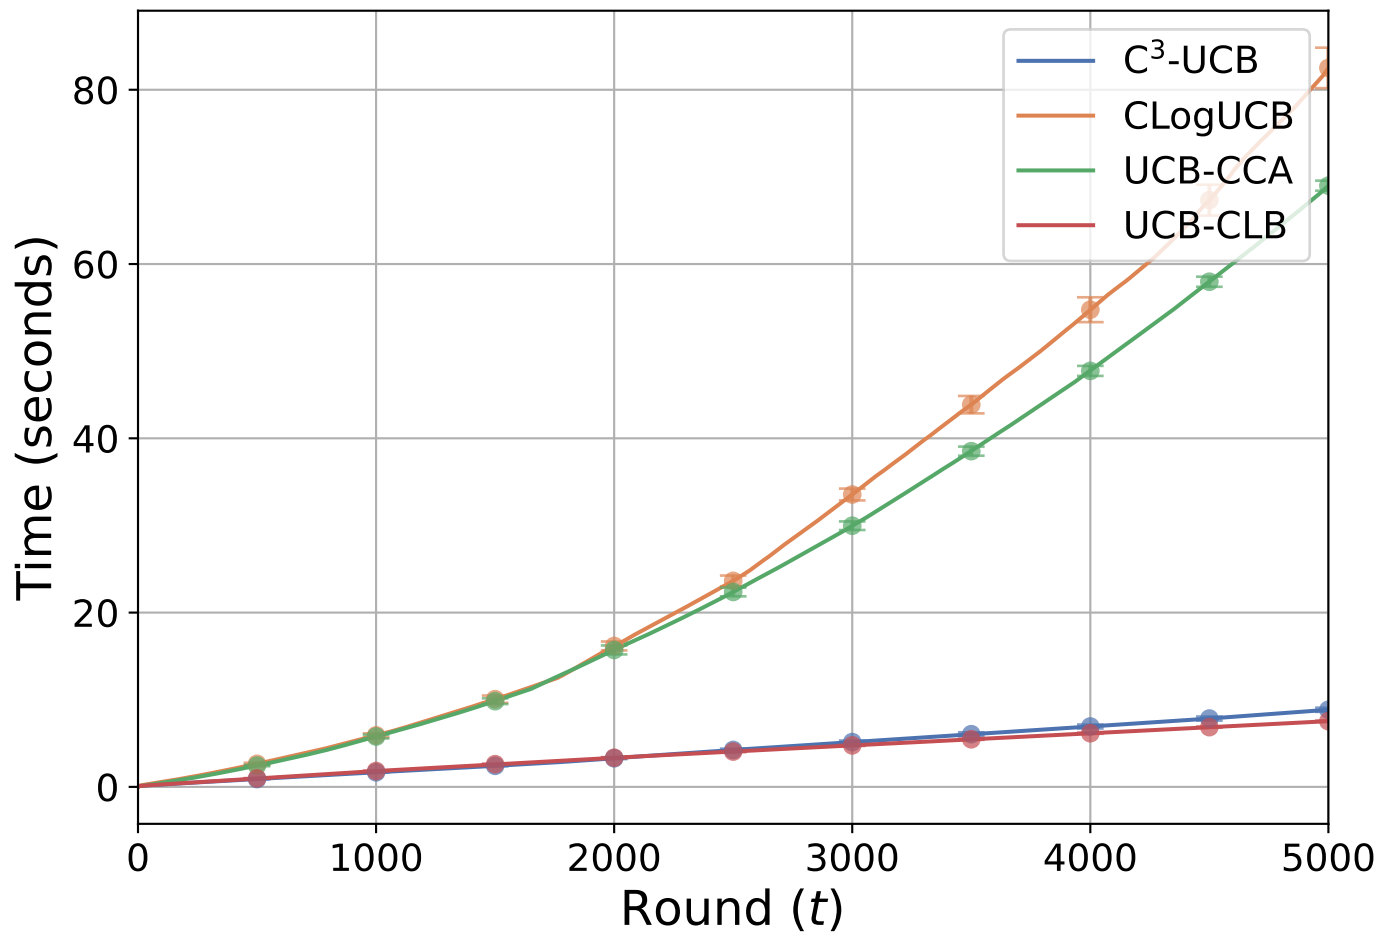

Supplement: supplementary_material [file Running_time_Logistic_T=5000_N=1642_K=10_d=25_B=20.0.pdf › [final camera-ready]2025-neurips/code/modules2/results-movielens/regret_images/Running_time_Logistic_T=5000_N=1642_K=10_d=25_B=20.0.pdf]

$N=1642, K=5, d=25$

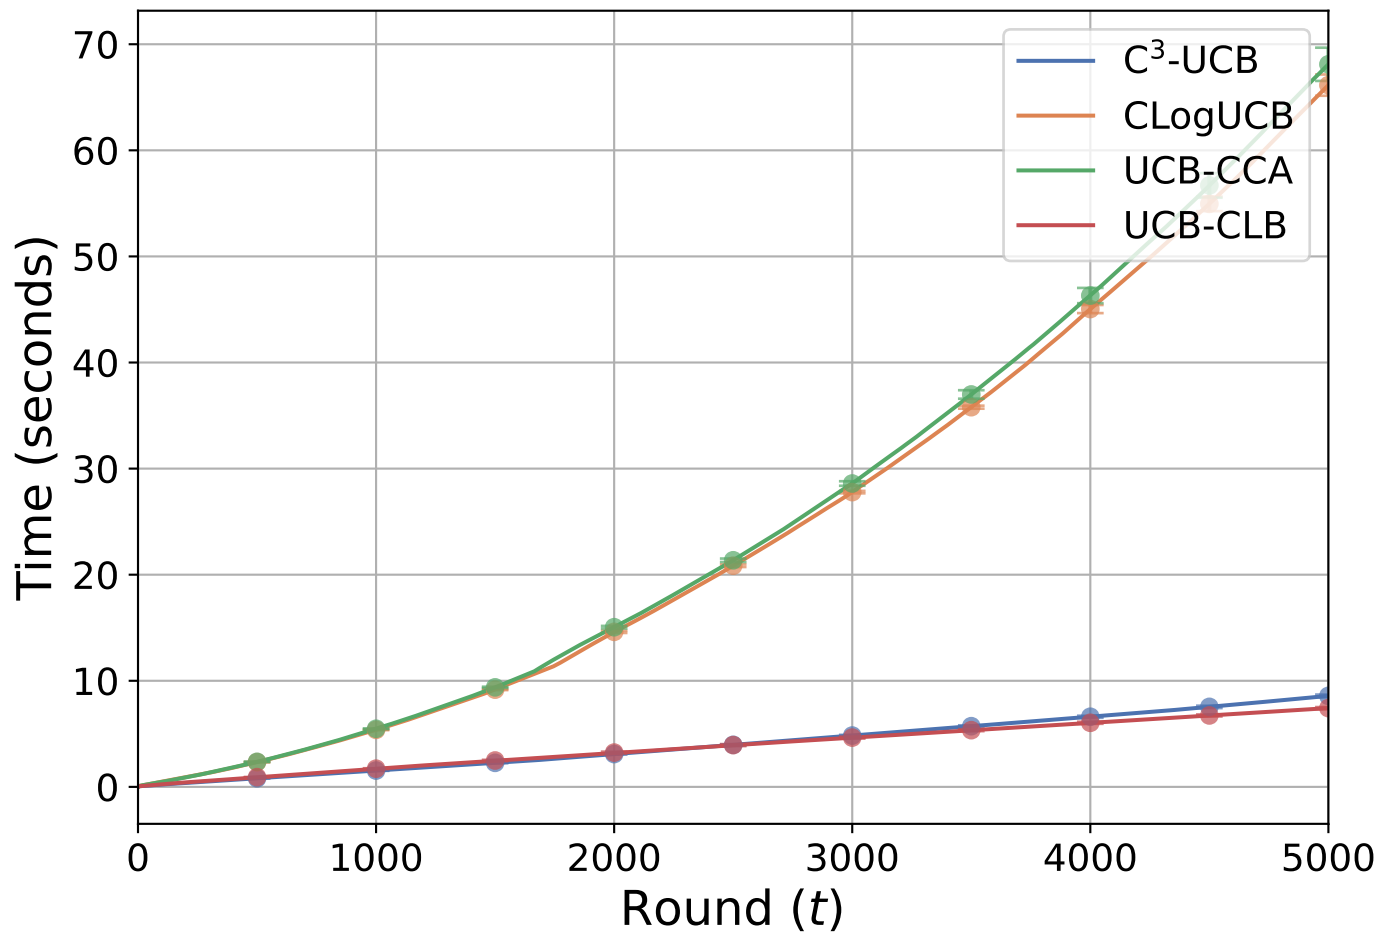

Supplement: supplementary_material [file Running_time_Logistic_T=5000_N=1642_K=5_d=25_B=20.0.pdf › [final camera-ready]2025-neurips/code/modules2/results-movielens/regret_images/Running_time_Logistic_T=5000_N=1642_K=5_d=25_B=20.0.pdf]
